# Supplementary material
Source: bioRxiv or medRxiv preprint supplement (https://medrxiv.org/highwire/filestream/81682/field_highwire_adjunct_files/0/2020.05.16.20091397-1.pdf)
Supplement: Supplementary file [file 2020.05.16.20091397-1.pdf]

## ***Supplemental Information***

### **SUPPLEMENTAL METHODS AND MATERIALS**

#### **Study Procedures and exclusion criteria**

Patients were recruited through the Psychotic Disorders Program at the Vanderbilt Psychiatric Hospital. Healthy subjects were recruited from Nashville and surrounding area via advertisement and word-of-mouth. All subjects were provided written informed consent prior to participating.

Exclusion criteria included age less than 16 or greater than 65; estimated pre-morbid IQ less than 70; presence of a medical illness or central nervous system disorder (e.g., multiple sclerosis, epilepsy) that would affect study results; reported pregnancy or lactation; history of significant head trauma; psychotropic drug use (healthy subjects only); substance abuse within last one month (patients) or lifetime history of substance abuse/dependence (healthy subjects); first degree relative with a psychotic illness (healthy subjects only); and MRI contra-indicators (e.g. metal implants, claustrophobia).

#### **MRI Data Acquisition and Pre-processing**

During resting state fMRI scan, participants were instructed to rest quietly with their eyes closed and to remain awake. The resting-state scan was acquired immediately after the survey and high-resolution structural scan, and was not preceded by a cognitive task.

The fMRI and T1-weighted images were pre-processed using the toolbox SPM (<https://www.fil.ion.ucl.ac.uk/spm/>). First, the fMRI images were corrected for slice timing and head motion. Twenty-four motion parameters (1) and mean cerebral-spinal-fluid (CSF) signal were regressed out. The resulting rsfMRI data were filtered with passband of 0.01Hz to 0.1Hz, co-registered to the MNI space, and detrended (max order=2). Then the time-course of each voxel was normalized into a new one with zero mean and unit variance. On the other hand, three brain tissues white matter (WM), gray matter (GM) and CSF were segmented on the T1-weighted images. Then the three tissue probability maps were normalized to a common space using DARTEL method (2) for further usage.

**Table S1.** P-values of t-test on FC comparison in WM between CON and SCZ groups.

|                | Resting State     |                   |                               | Working Memory I  |                   |                               | Working Memory II |                   |                               |
|----------------|-------------------|-------------------|-------------------------------|-------------------|-------------------|-------------------------------|-------------------|-------------------|-------------------------------|
|                | CON<br>(mean±std) | SCZ<br>(mean±std) | <i>p</i><br>( <i>t</i> -test) | CON<br>(mean±std) | SCZ<br>(mean±std) | <i>p</i><br>( <i>t</i> -test) | CON<br>(mean±std) | SCZ<br>(mean±std) | <i>p</i><br>( <i>t</i> -test) |
| CST. <i>l</i>  | .29±.13           | .27±.12           | .298                          | .30±.12           | .29±.13           | .575                          | .31±.12           | .29±.12           | .424                          |
| ML. <i>l</i>   | .12±.11           | .12±.11           | .993                          | .14±.12           | .14±.12           | .999                          | .14±.10           | .14±.12           | .852                          |
| ICBP. <i>l</i> | .18±.13           | .16±.12           | .341                          | .20±.13           | .17±.11           | .112                          | .20±.11           | .18±.10           | .135                          |
| SCBP. <i>l</i> | .15±.12           | .15±.11           | .896                          | .17±.12           | .16±.11           | .626                          | .17±.12           | .16±.10           | .522                          |
| CP. <i>l</i>   | .23±.12           | .23±.12           | .859                          | .26±.12           | .25±.12           | .495                          | .27±.12           | .25±.11           | .437                          |
| ALIC. <i>l</i> | .35±.14           | .31±.13           | .127                          | .38±.12           | .35±.13           | .205                          | .39±.11           | .36±.12           | .138                          |
| PLIC. <i>l</i> | .31±.14           | .28±.11           | .175                          | .32±.10           | .31±.11           | .314                          | .34±.10           | .31±.10           | .078                          |
| RLIC. <i>l</i> | .26±.13           | .25±.11           | .622                          | .30±.11           | .28±.10           | .532                          | .31±.10           | .29±.10           | .132                          |
| ACR. <i>l</i>  | .19±.11           | .17±.09           | .138                          | .19±.09           | .19±.09           | .953                          | .20±.08           | .19±.09           | .332                          |
| SCR. <i>l</i>  | .19±.10           | .19±.10           | .966                          | .22±.08           | .23±.09           | .252                          | .22±.08           | .23±.09           | .682                          |
| PCR. <i>l</i>  | .14±.12           | .16±.11           | .350                          | .16±.10           | .19±.10           | .077                          | .17±.09           | .18±.09           | .290                          |
| PTR. <i>l</i>  | .10±.11           | .14±.10           | <b>.031*</b>                  | .13±.10           | .15±.11           | .159                          | .14±.11           | .15±.11           | .433                          |
| SS. <i>l</i>   | .15±.11           | .15±.10           | .772                          | .15±.11           | .18±.09           | .154                          | .17±.10           | .18±.08           | .487                          |
| EC. <i>l</i>   | .39±.14           | .32±.12           | <b>&lt;.001**</b>             | .40±.11           | .34±.12           | <b>.006**</b>                 | .41±.10           | .35±.11           | <b>&lt;.001**</b>             |
| CGG. <i>l</i>  | .38±.15           | .33±.12           | <b>.017*</b>                  | .39±.13           | .34±.11           | <b>.013*</b>                  | .40±.12           | .34±.11           | <b>.007**</b>                 |
| CGH. <i>l</i>  | .26±.14           | .23±.11           | .285                          | .27±.11           | .25±.12           | .222                          | .27±.11           | .24±.11           | .091                          |
| FXC. <i>l</i>  | .15±.13           | .18±.11           | .123                          | .19±.12           | .21±.09           | .356                          | .20±.11           | .21±.09           | .637                          |
| SLF. <i>l</i>  | .24±.12           | .22±.10           | .272                          | .27±.09           | .26±.09           | .870                          | .27±.09           | .26±.09           | .362                          |
| SFO. <i>l</i>  | .18±.12           | .17±.12           | .709                          | .21±.11           | .22±.11           | .841                          | .22±.10           | .22±.10           | .989                          |
| UF. <i>l</i>   | .22±.13           | .16±.09           | <b>.006**</b>                 | .21±.10           | .17±.11           | <b>.017*</b>                  | .22±.09           | .18±.10           | <b>.007**</b>                 |
| MCBP           | .31±.13           | .29±.11           | .363                          | .34±.13           | .32±.11           | .240                          | .35±.12           | .32±.10           | .181                          |
| PCT            | .27±.14           | .24±.11           | .087                          | .28±.12           | .26±.12           | .425                          | .29±.12           | .26±.12           | .242                          |
| GCC            | .29±.13           | .24±.12           | <b>.008**</b>                 | .29±.11           | .25±.11           | <b>.046*</b>                  | .29±.10           | .25±.10           | <b>.017*</b>                  |
| BCC            | .24±.15           | .18±.12           | <b>.006**</b>                 | .25±.13           | .20±.12           | <b>.014*</b>                  | .25±.12           | .21±.11           | <b>.014*</b>                  |
| SCC            | .21±.12           | .21±.10           | .856                          | .22±.11           | .24±.11           | .243                          | .24±.10           | .23±.10           | .919                          |
| FX             | .28±.12           | .28±.13           | .828                          | .27±.11           | .28±.13           | .515                          | .28±.10           | .28±.12           | .926                          |
| UF. <i>r</i>   | .21±.10           | .16±.10           | <b>.003**</b>                 | .20±.10           | .17±.09           | .070                          | .21±.09           | .17±.09           | <b>.011*</b>                  |
| SFO. <i>r</i>  | .18±.10           | .18±.10           | .678                          | .20±.10           | .21±.11           | .815                          | .21±.09           | .21±.11           | .859                          |
| SLF. <i>r</i>  | .26±.12           | .23±.09           | .113                          | .27±.10           | .26±.09           | .464                          | .28±.09           | .26±.09           | .209                          |
| FXC. <i>r</i>  | .13±.11           | .13±.10           | .966                          | .19±.11           | .14±.11           | <b>.009**</b>                 | .19±.10           | .14±.10           | <b>.006**</b>                 |
| CGH. <i>r</i>  | .29±.14           | .27±.12           | .171                          | .31±.11           | .27±.11           | <b>.013*</b>                  | .32±.11           | .27±.10           | <b>.005**</b>                 |
| CGG. <i>r</i>  | .38±.14           | .32±.11           | <b>.013*</b>                  | .38±.12           | .34±.11           | <b>.020*</b>                  | .40±.11           | .35±.10           | <b>.007**</b>                 |
| EC. <i>r</i>   | .38±.13           | .32±.12           | <b>&lt;.001**</b>             | .39±.11           | .34±.12           | <b>.017*</b>                  | .39±.11           | .34±.11           | <b>.006**</b>                 |
| SS. <i>r</i>   | .20±.11           | .19±.11           | .539                          | .21±.11           | .19±.10           | .301                          | .22±.10           | .20±.10           | .304                          |
| PTR. <i>r</i>  | .18±.11           | .19±.11           | .681                          | .18±.10           | .20±.10           | .330                          | .19±.09           | .20±.10           | .678                          |
| PCR. <i>r</i>  | .14±.11           | .15±.10           | .470                          | .14±.10           | .18±.11           | <b>.026*</b>                  | .15±.09           | .18±.10           | .099                          |
| SCR. <i>r</i>  | .17±.10           | .17±.10           | .985                          | .19±.09           | .20±.09           | .538                          | .19±.08           | .20±.09           | .814                          |
| ACR. <i>r</i>  | .18±.10           | .17±.10           | .898                          | .19±.09           | .20±.09           | .478                          | .19±.08           | .20±.09           | .639                          |
| RLIC. <i>r</i> | .27±.12           | .25±.12           | .356                          | .28±.12           | .27±.10           | .461                          | .30±.11           | .28±.10           | .235                          |
| PLIC. <i>r</i> | .27±.13           | .25±.12           | .270                          | .28±.11           | .27±.12           | .595                          | .30±.11           | .27±.11           | .137                          |
| ALIC. <i>r</i> | .32±.13           | .28±.13           | .069                          | .36±.12           | .32±.13           | .093                          | .37±.11           | .33±.12           | <b>.045*</b>                  |
| CP. <i>r</i>   | .22±.11           | .22±.12           | .873                          | .26±.11           | .23±.11           | .079                          | .27±.11           | .23±.10           | <b>.029*</b>                  |
| SCBP. <i>r</i> | .19±.12           | .17±.10           | .284                          | .21±.12           | .18±.12           | .149                          | .21±.11           | .18±.11           | .123                          |
| ICBP. <i>r</i> | .20±.12           | .18±.11           | .312                          | .23±.12           | .21±.10           | .218                          | .23±.11           | .20±.09           | .108                          |
| ML. <i>r</i>   | .16±.12           | .14±.11           | .373                          | .18±.11           | .16±.11           | .445                          | .18±.11           | .16±.11           | .364                          |
| CST. <i>r</i>  | .31±.14           | .27±.12           | .070                          | .32±.12           | .29±.13           | .163                          | .32±.12           | .29±.12           | .118                          |

Note: \* Indicates  $p < .05$  and \*\* indicates  $p < .01$

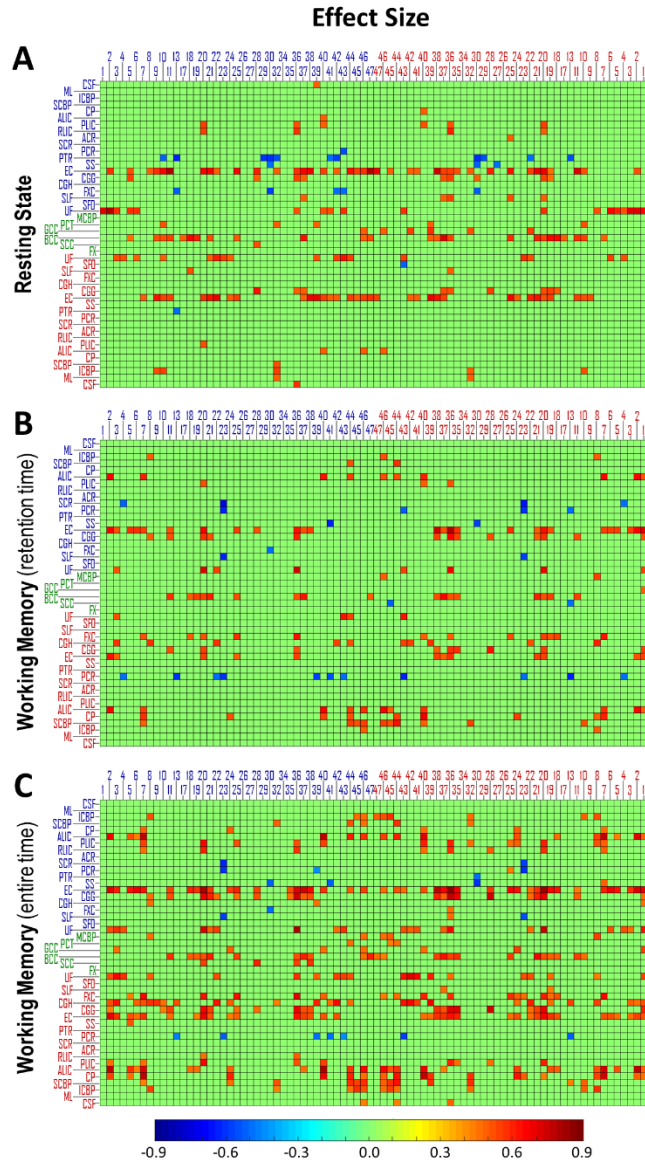

**Figure S1.** Effect size of FC difference in three scenarios. **(A-C)** Effect size of FC difference between CON and SCZ groups in three scenarios: **(A)** resting state, **(B)** working memory I and **(C)** working memory II. The effect sizes with  $p_{FDR} > .05$  were set to zero. The blue/red indices labeling each column indicate number of Brodmann areas in left/right hemispheres. The blue/green/red abbreviations labeling each row indicate WM tracts in left/middle/right of brain. See Table 2 for lists of these ROIs.

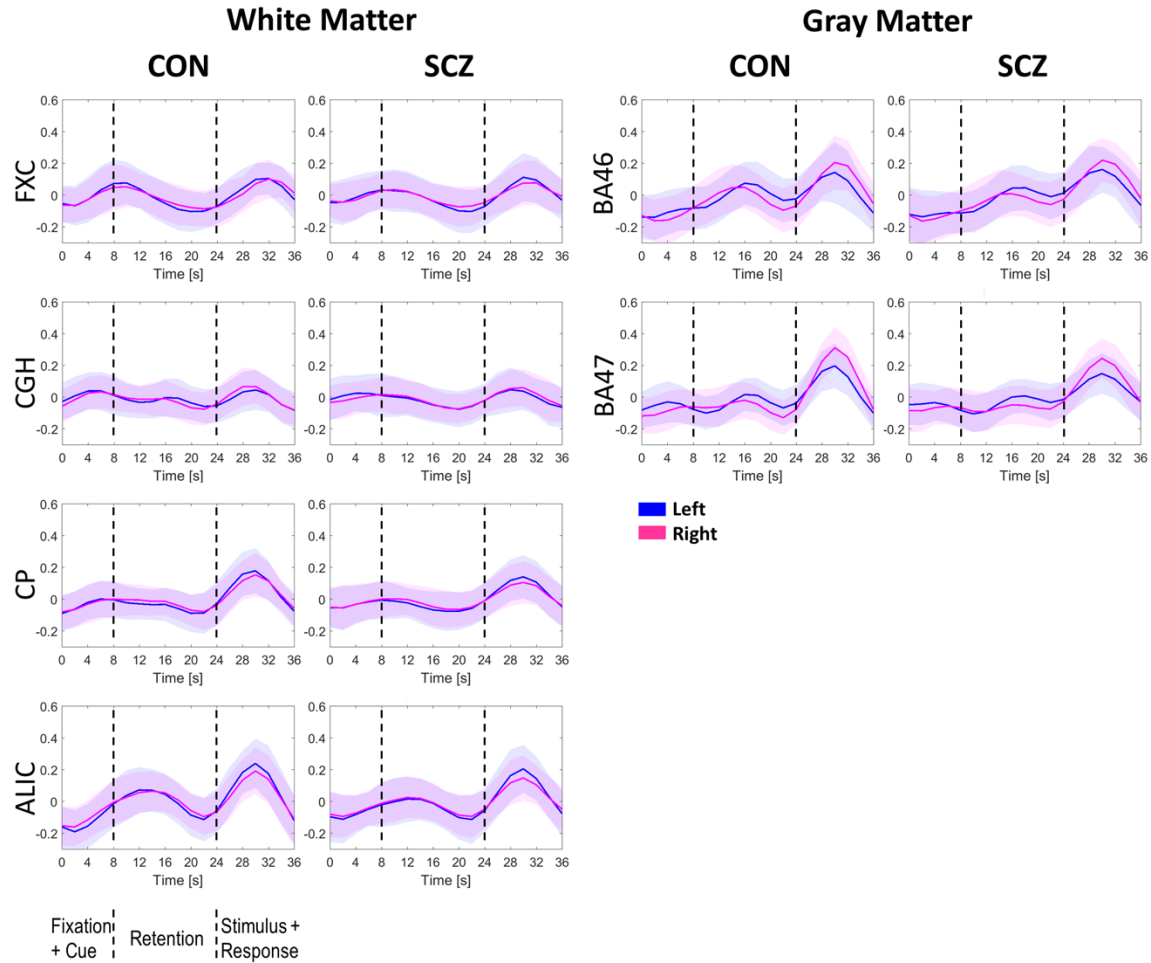

**Figure S2.** Average time-courses of a number of WM and GM ROIs in working memory scenarios. One working memory trial has 19 dynamics (duration=38s), in which 8 dynamics (duration=16s) between the two dotted vertical lines are retention time.

1. Friston KJ, Williams S, Howard R, Frackowiak RS, Turner R (1996): Movement-related effects in fMRI time-series. *Magn Reson Med.* 35:346-355.
2. Ashburner J (2007): A fast diffeomorphic image registration algorithm. *NeuroImage.* 38:95-113.
